# Supplementary material
Source: Springer Nature journal article supplement (https://www.springermedizin.de/resource/supplementary/13058_2010_9477_MOESM10_ESM.pdf/9702238)

**A**

Positive v Negative

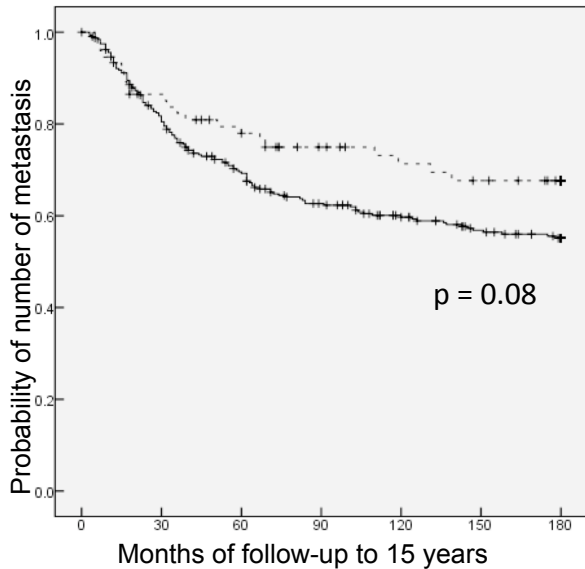**Number being followed at the stated months**

| Months:   | 0   | 30  | 60  | 90  | 120 | 150 | 180 |
|-----------|-----|-----|-----|-----|-----|-----|-----|
| Negative: | 319 | 248 | 204 | 175 | 152 | 135 | 121 |
| All pos:  | 74  | 62  | 52  | 44  | 39  | 36  | 30  |

**B**

Strongly positive v Negative

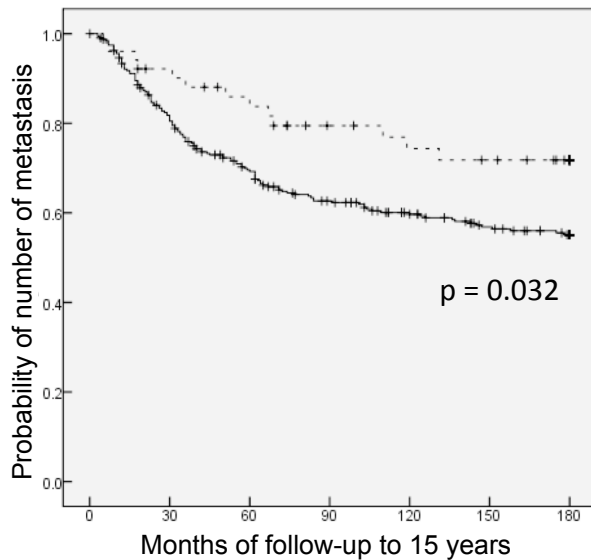**Number being followed at the stated months**

| Months:     | 0   | 30  | 60  | 90  | 120 | 150 | 180 |
|-------------|-----|-----|-----|-----|-----|-----|-----|
| Negative:   | 319 | 248 | 204 | 175 | 152 | 135 | 121 |
| Strong pos: | 51  | 45  | 39  | 32  | 29  | 27  | 21  |

**C**

Strongly positive v Negative

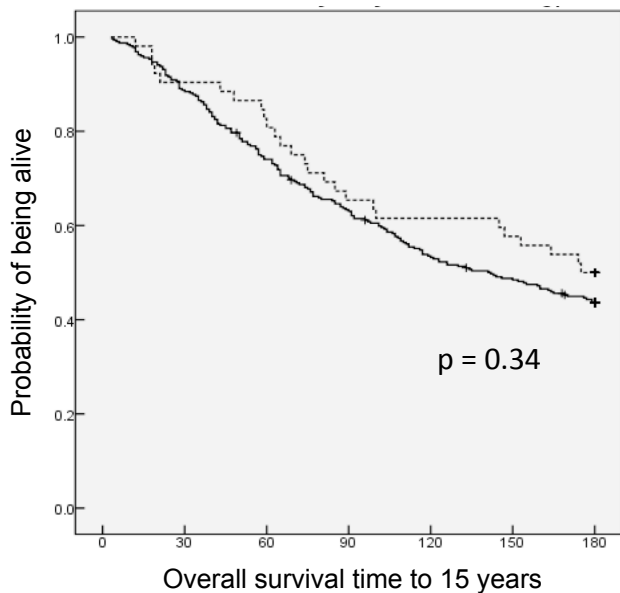

Supplement: MOESM10 [file 9702238]
